# Supplementary material for: Plastics Derived Endocrine Disruptors (BPA, DEHP and DBP) Induce Epigenetic Transgenerational Inheritance of Obesity, Reproductive Disease and Sperm Epimutations
Source: PubMed Central journal article supplement (PMC3554682; doi:10.1371/journal.pone.0055387), 2013-01-24

Supplemental Figure S2

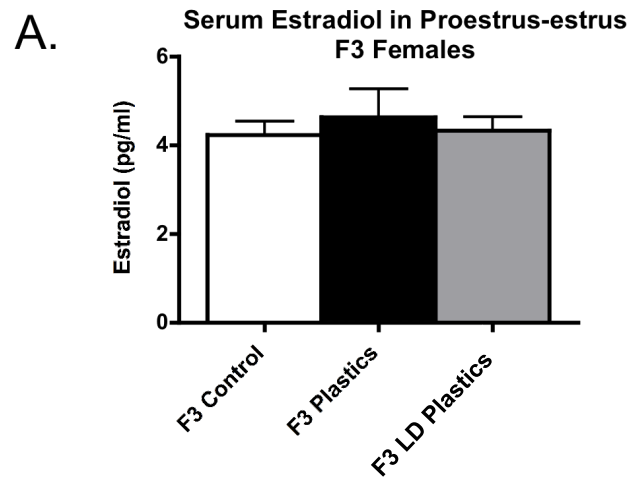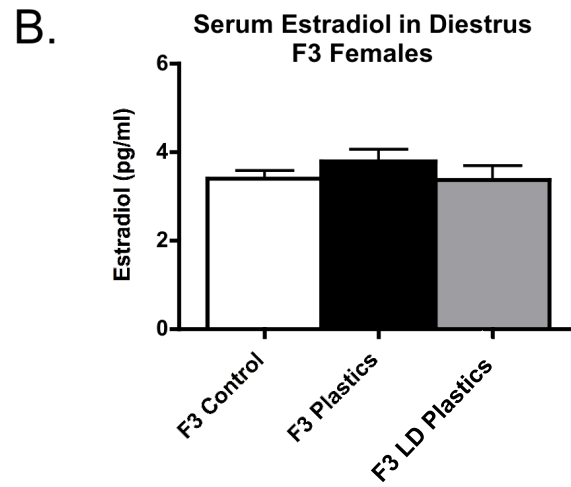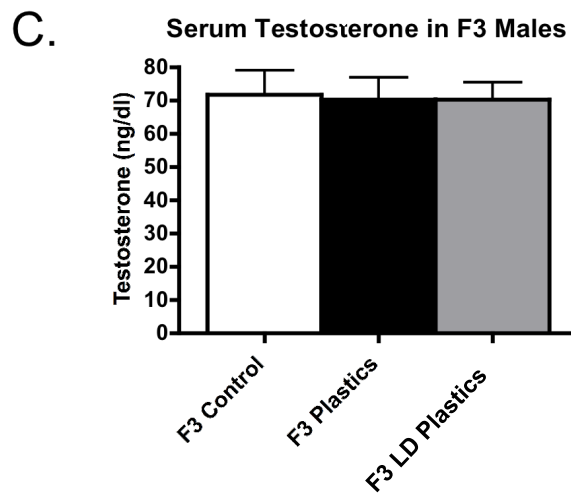

Supplement: pone.0055387.s002.pdf [file pone.0055387.s002.pdf]
