# Supplementary material for: Plastics Derived Endocrine Disruptors (BPA, DEHP and DBP) Induce Epigenetic Transgenerational Inheritance of Obesity, Reproductive Disease and Sperm Epimutations
Source: PubMed Central journal article supplement (PMC3554682; doi:10.1371/journal.pone.0055387), 2013-01-24
Supplement: pone.0055387.s003.pdf [file pone.0055387.s003.pdf]

**Supplemental Table S1A.** Body Weight and Organ Weights in Control, Plastics and Lower Dose Plastics F1 and F3 Generation Female Rats (Mean  $\pm$  Standard Error).

| Generation | Treatment           | Sex | Body Weight (grams) | Ovaries (% BW)          | Uterus (% BW)             | Kidney (% BW)          |
|------------|---------------------|-----|---------------------|-------------------------|---------------------------|------------------------|
| F1         | Control             | F   | 310.9<br>$\pm$ 6.15 | 0.0532<br>$\pm$ 0.0032  | 0.2589<br>$\pm$ 0.0209    | 0.3276<br>$\pm$ 0.0127 |
| F1         | Plastics            | F   | 300.0<br>$\pm$ 5.83 | 0.0489<br>$\pm$ 0.0036  | 0.3143<br>$\pm$ 0.0289    | 0.3469<br>$\pm$ 0.0077 |
| F1         | Lower Dose Plastics | F   | 290.7<br>$\pm$ 3.91 | 0.0374*<br>$\pm$ 0.0035 | 0.4440***<br>$\pm$ 0.0302 | 0.3551<br>$\pm$ 0.0079 |
| F3         | Control             | F   | 293.6<br>$\pm$ 2.31 | 0.0501<br>$\pm$ 0.0011  | 0.3883<br>$\pm$ 0.0150    | 0.3567<br>$\pm$ 0.0036 |
| F3         | Plastics            | F   | 293.6<br>$\pm$ 3.25 | 0.04796<br>$\pm$ 0.0017 | 0.3421*<br>$\pm$ 0.0135   | 0.3504<br>$\pm$ 0.0040 |
| F3         | Lower Dose Plastics | F   | 293.4<br>$\pm$ 3.02 | 0.0502<br>$\pm$ 0.0016  | 0.3201*<br>$\pm$ 0.0118   | 0.3589<br>$\pm$ 0.0049 |

**Supplemental Table S1B.** Body Weight (grams) and Organ Weights (% of body weight) in Control, Plastics and Lower Dose Plastics F1 and F3 generation Male Rats (Mean  $\pm$  SE).

| Generation | Treatment           | Sex | Body Weight (grams)  | Testis (% BW)          | Prostate (% BW)        | Seminal Vesicle (% BW)   | Epididymis (% BW)       | Kidney (% BW)          |
|------------|---------------------|-----|----------------------|------------------------|------------------------|--------------------------|-------------------------|------------------------|
| F1         | Control             | M   | 545.3<br>$\pm$ 8.66  | 0.7599<br>$\pm$ 0.0154 | 0.2239<br>$\pm$ 0.0076 | 0.1395<br>$\pm$ 0.0092   | 0.2585<br>$\pm$ 0.0045  | 0.3821<br>$\pm$ 0.0092 |
| F1         | Plastics            | M   | 552.4<br>$\pm$ 9.54  | 0.7788<br>$\pm$ 0.0235 | 0.2221<br>$\pm$ 0.0063 | 0.1237<br>$\pm$ 0.0078   | 0.2574<br>$\pm$ 0.0051  | 0.3629<br>$\pm$ 0.0154 |
| F1         | Lower Dose Plastics | M   | 557.2<br>$\pm$ 9.44  | 0.7683<br>$\pm$ 0.0168 | 0.2002<br>$\pm$ 0.0079 | 0.1197<br>$\pm$ 0.0057   | 0.2494<br>$\pm$ 0.0059  | 0.3738<br>$\pm$ 0.0130 |
| F3         | Control             | M   | 515.80<br>$\pm$ 6.09 | 0.8153<br>$\pm$ 0.0102 | 0.1970<br>$\pm$ 0.0041 | 0.1330<br>$\pm$ 0.0038   | 0.2628<br>$\pm$ 0.0028  | 0.3791<br>$\pm$ 0.0010 |
| F3         | Plastics            | M   | 538.0*<br>$\pm$ 5.33 | 0.8040<br>$\pm$ 0.0094 | 0.1886<br>$\pm$ 0.0044 | 0.1203*<br>$\pm$ 0.0039  | 0.2604<br>$\pm$ 0.0036  | 0.3467<br>$\pm$ 0.0055 |
| F3         | Lower Dose Plastics | M   | 512.8<br>$\pm$ 4.66  | 0.8080<br>$\pm$ 0.0130 | 0.1883<br>$\pm$ 0.0041 | 0.1152**<br>$\pm$ 0.0048 | 0.2721*<br>$\pm$ 0.0034 | 0.3818<br>$\pm$ 0.0055 |
