# Supplementary material for: Plastics Derived Endocrine Disruptors (BPA, DEHP and DBP) Induce Epigenetic Transgenerational Inheritance of Obesity, Reproductive Disease and Sperm Epimutations
Source: PubMed Central journal article supplement (PMC3554682; doi:10.1371/journal.pone.0055387), 2013-01-24
Supplement: pone.0055387.s004.pdf [file pone.0055387.s004.pdf]

**Supplemental Table S2A.** Individual Disease Incidence in F1 Generation Control, Plastics and Lower Dose Plastics Female Rats.

| Animal | Animal ID  | Sex | Age  | Puberty | PFL | PCO | Kidney | Tumor | Obesity | Total Disease |
|--------|------------|-----|------|---------|-----|-----|--------|-------|---------|---------------|
| C1     | DCS0-1-1-1 | F   | 1 Yr | -       | -   | -   | -      | -     | -       |               |
| C2     | DCS0-1-1-2 | F   | 1 Yr | -       |     |     | -      | -     | -       |               |
| C3     | DCS0-1-1-3 | F   | 1 Yr | +       |     |     | +      | -     | -       | 2             |
| C4     | DCR1-1-2-1 | F   | 1 Yr | +       | -   | -   | -      | -     | -       | 1             |
| C5     | DCR1-1-2-2 | F   | 1 Yr | +       |     |     | -      | -     | -       | 1             |
| C6     | DCR1-1-2-3 | F   | 1 Yr | +       |     |     |        | +     | -       | 2             |
| C7     | DCB1-1-3-1 | F   | 1 Yr | -       |     |     | -      | -     | -       |               |
| C8     | DCB1-1-3-2 | F   | 1 Yr | -       |     |     |        | -     | -       |               |
| C9     | DCF1-1-4-1 | F   | 1 Yr | +       | -   | -   | -      | +     | -       | 2             |
| C10    | DCF1-1-4-2 | F   | 1 Yr | -       | -   | -   | -      | -     | -       |               |
| C11    | DCF1-1-4-3 | F   | 1 Yr | +       | -   | -   | +      | -     | -       | 2             |
| C12    | DCL1-1-5-1 | F   | 1 Yr | -       | +   | -   | +      | -     | -       | 2             |
| C13    | DCL1-1-5-2 | F   | 1 Yr | -       |     |     | -      | -     | -       |               |
| C14    | DCL1-1-5-3 | F   | 1 Yr | -       | -   | -   | -      | -     | -       |               |
| C15    | DCM2-1-6-1 | F   | 1 Yr | -       | -   | -   | -      | -     | -       |               |
| C16    | DCM2-1-6-2 | F   | 1 Yr | +       |     |     | -      | -     | -       | 1             |
| C17    | DCM2-1-6-3 | F   | 1 Yr | +       | -   | -   | -      | -     | -       | 1             |
| C18    | DCF0-1-7-1 | F   | 1 Yr | -       |     |     | -      | -     | -       |               |
| C19    | DCF0-1-7-2 | F   | 1 Yr | -       |     |     | -      | -     | -       |               |
| C20    | DCF0-1-7-3 | F   | 1 Yr | -       |     |     | -      | -     | -       |               |
| P1     | DBL2-1-1-1 | F   | 1 Yr | -       | +   | -   | +      | -     | -       | 2             |
| P2     | DBL2-1-1-2 | F   | 1 Yr | +       | +   | -   | -      | -     | -       | 2             |
| P3     | DBM1-1-2-1 | F   | 1 Yr | +       | +   | -   | -      | -     | -       | 2             |
| P4     | DBM1-1-2-2 | F   | 1 Yr | +       | +   | +   | +      | -     | -       | 4             |

| Animal | Animal ID   | Sex | Age  | Puberty | PFL | PCO | Kidney | Tumor | Obesity | Total Disease |
|--------|-------------|-----|------|---------|-----|-----|--------|-------|---------|---------------|
| P5     | DBH1-1-3-1  | F   | 1 Yr | -       | -   | +   | -      | -     | -       | 1             |
| P6     | DBH1-1-3-2  | F   | 1 Yr | +       | +   | +   | -      | -     | -       | 3             |
| P7     | DBH1-1-3-3  | F   | 1 Yr | +       |     |     | -      | -     | -       | 1             |
| P8     | DBJ0-1-3-1  | F   | 1 Yr | +       | +   | -   | +      | -     | -       | 3             |
| P9     | DBJ0-1-3-2  | F   | 1 Yr | +       | +   | +   |        | +     | -       | 4             |
| P10    | DBJ0-1-3-3  | F   | 1 Yr | +       | -   | +   | +      | -     | -       | 3             |
| P11    | DBJ0-1-3-4  | F   | 1 Yr | +       |     |     | -      | -     | -       | 1             |
| P12    | DBS1-1-4-1  | F   | 1 Yr | +       |     |     | -      | -     | -       | 1             |
| P13    | DBS1-1-4-2  | F   | 1 Yr | +       |     |     | +      | -     | -       | 2             |
| P14    | DBS0-1-5-4  | F   | 1 Yr |         |     |     |        | -     | -       |               |
| P15    | DBS0-1-5-5  | F   | 1 Yr |         |     |     |        | -     | -       |               |
| P16    | DBS0-1-5-6  | F   | 1 Yr |         |     |     |        | -     | -       |               |
| P17    | DBS0-1-5-7  | F   | 1 Yr |         |     |     |        | -     | -       |               |
| LP1    | DLBB1-1-1-1 | F   | 1 Yr | +       | +   | +   | +      | -     | -       | 4             |
| LP2    | DLBB1-1-1-2 | F   | 1 Yr | -       |     |     |        | -     | -       |               |
| LP3    | DLBS0-1-2-1 | F   | 1 Yr | -       | +   | +   | +      | -     | -       | 3             |
| LP4    | DLBS0-1-2-2 | F   | 1 Yr | -       |     |     |        | -     | -       |               |
| LP5    | DLBS0-1-2-3 | F   | 1 Yr | -       |     |     |        | -     | -       |               |
| LP6    | DLBS0-1-2-4 | F   | 1 Yr | -       |     |     |        | -     | -       |               |
| LP7    | DLBW1-1-3-1 | F   | 1 Yr | -       | +   | +   | +      | -     | -       | 3             |
| LP8    | DLBW1-1-3-2 | F   | 1 Yr | -       |     |     |        | -     | -       |               |
| LP9    | DLBW1-1-3-3 | F   | 1 Yr | -       |     |     |        | -     | -       |               |
| LP10   | DLBJ2-1-4-2 | F   | 1 Yr | +       |     |     |        | -     | -       | 1             |
| LP11   | DLBJ2-1-4-3 | F   | 1 Yr | +       |     |     | +      | -     | -       | 2             |
| LP12   | DLBT2-1-5-4 | F   | 1 Yr | +       |     |     | +      | -     | -       | 2             |

| Animal | Animal ID    | Sex | Age  | Puberty | PFL | PCO | Kidney | Tumor | Obesity | Total Disease |
|--------|--------------|-----|------|---------|-----|-----|--------|-------|---------|---------------|
| LP13   | DLBT2-1-5-5  | F   | 1 Yr | +       |     |     |        | -     | -       | 1             |
| LP14   | DLBT2-1-5-6  | F   | 1 Yr | +       |     |     |        | -     | -       | 1             |
| LP15   | DLBT2-1-5-7  | F   | 1 Yr | +       |     |     |        | -     | -       | 1             |
| LP16   | DLBF2-1-6-1  | F   | 1 Yr | -       | +   | +   | -      | -     | -       | 2             |
| LP17   | DLBF2-1-6-2  | F   | 1 Yr | -       |     |     |        | -     | -       |               |
| LP18   | DLBF2-1-6-3  | F   | 9 m. | +       |     |     |        | +     | -       | 2             |
| LP19   | DLBT0-1-7-5  | F   | 1 Yr | -       | +   | +   | -      | -     | -       | 2             |
| LP20   | DLBT0-1-7-6  | F   | 1 Yr | -       |     |     |        | -     | -       |               |
| LP21   | DLBT0-1-7-7  | F   | 1 Yr | -       |     |     |        | -     | -       |               |
| LP22   | DLBT0-1-7-8  | F   | 1 Yr | +       |     |     |        | -     | -       | 1             |
| LP23   | DLBT0-1-7-9  | F   | 1 Yr | +       |     |     |        | -     | -       | 1             |
| LP24   | DLBH0-1-8-1  | F   | 1 Yr | +       | +   | +   | -      | -     | -       | 3             |
| LP25   | DLBH0-1-8-2  | F   | 1 Yr | -       | +   | +   |        | -     | -       | 2             |
| LP26   | DLBK0-1-9-2  | F   | 1 Yr | -       | +   | +   | -      | -     | -       | 2             |
| LP27   | DLBK0-1-9-3  | F   | 1 Yr | -       | +   | +   |        | -     | -       | 2             |
| LP28   | DLBJ0-1-10-1 | F   | 1 Yr | -       |     |     | -      | -     | -       |               |
| LP29   | DLBJ0-1-10-2 | F   | 1 Yr | -       |     |     |        | -     | -       |               |
| LP30   | DLBJ0-1-10-3 | F   | 1 Yr | -       |     |     |        | -     | -       |               |
| LP31   | DLBJ0-1-10-4 | F   | 1 Yr | -       |     |     |        | -     | -       |               |
| LP32   | DLBJ0-1-10-5 | F   | 1 Yr | -       |     |     |        | -     | -       |               |
| LP33   | DLBA2-1-11-1 | F   | 1 Yr | +       |     |     | -      | -     | -       | 1             |
| LP34   | DLBA2-1-11-2 | F   | 1 Yr | +       |     |     |        | -     | -       | 1             |
| LP35   | DLBB1-1-12-1 | F   | 1 Yr | +       |     |     | -      | -     | -       | 1             |

A '+' indicates the presence; A '-' indicates the absence of disease; A blank cell indicates 'not determined.' Animal IDs with a 'C' belong to Control group, those with a 'P' belong to plastics group and those with a 'LP' belong to lower dose plastics group. PFL = Primordial follicle loss; PCO= Polycystic ovarian disease. See 'Materials and Methods' section for disease assessment in rats. The number of animals per litter (litter representation) mean  $\pm$  SEM used for each specific disease/abnormality assessment between the control versus plastic or lower dose plastic lineages were not found to be statistically different ( $p>0.05$ ), so no litter bias detected.

**Supplemental Table S2B.** Individual Disease Incidence in F1 Generation Control, Plastics, and Lower Dose Plastics Male Rats.

| Animal | Animal ID   | Sex | Age  | Puberty | Testis | Prostate | Kidney | Tumor | Obesity | Total Disease |
|--------|-------------|-----|------|---------|--------|----------|--------|-------|---------|---------------|
| C1     | DCS0-1-1-5  | M   | 1 Yr | -       | +      | -        | -      | -     | -       | 1             |
| C2     | DCS0-1-1-6  | M   | 1 Yr | -       | -      | -        | -      | -     | -       |               |
| C3     | DCR1-1-2-5  | M   | 1 Yr | -       | -      | -        | -      | -     | -       |               |
| C4     | DCR1-1-2-6  | M   | 1 Yr | -       | -      | -        | -      | -     | -       |               |
| C5     | DCR1-1-2-7  | M   | 1 Yr | -       | -      | +        | -      | -     | -       | 1             |
| C6     | DCR1-1-2-8  | M   | 1 Yr | -       | -      | -        | -      | -     | -       |               |
| C7     | DCB1-1-3-3  | M   | 1 Yr | -       | +      | -        | -      | -     | -       | 1             |
| C8     | DCB1-1-3-4  | M   | 1 Yr | -       | -      | -        | -      | -     | -       |               |
| C9     | DCF1-1-4-6  | M   | 1 Yr | -       | -      | -        | -      | -     | -       |               |
| C10    | DCF1-1-4-7  | M   | 1 Yr | +       | -      | +        | -      | -     | -       | 2             |
| C11    | DCF1-1-4-8  | M   | 1 Yr | -       | -      | -        | -      | -     | -       |               |
| C12    | DCF1-1-4-9  | M   | 1 Yr | +       | -      | -        | -      | -     | -       | 1             |
| C13    | DCL1-1-5-6  | M   | 1 Yr | -       | -      | -        | -      | -     | -       |               |
| C14    | DCL1-1-5-7  | M   | 1 Yr | -       | -      | +        | -      | -     | -       | 1             |
| C15    | DCL1-1-5-8  | M   | 1 Yr | -       | -      | -        | -      | -     | -       |               |
| C16    | DCL1-1-5-9  | M   | 1 Yr | -       | -      | +        | -      | -     | -       | 1             |
| C17    | DCM2-1-6-7  | M   | 1 Yr | +       | -      | +        | -      | -     | -       | 2             |
| C18    | DCM2-1-6-9  | M   | 1 Yr | +       | +      | -        | -      | -     | -       | 2             |
| C19    | DCM2-1-6-10 | M   | 1 Yr | -       | +      | -        | -      | -     | -       | 1             |
| C20    | DCF0-1-7-5  | M   | 1 Yr | -       | -      | -        | -      | -     | -       |               |
| C21    | DCF0-1-7-6  | M   | 1 Yr | -       | -      | -        | +      | -     | -       | 1             |
| C22    | DCF0-1-7-7  | M   | 1 Yr | -       | -      | -        | -      | -     | -       |               |

| Animal | Animal ID   | Sex | Age  | Puberty | Testis | Prostate | Kidney | Tumor | Obesity | Total Disease |
|--------|-------------|-----|------|---------|--------|----------|--------|-------|---------|---------------|
| P1     | DBL2-1-1-6  | M   | 1 Yr | +       | -      | +        | -      | -     | -       | 2             |
| P2     | DBM1-1-2-4  | M   | 1 Yr | +       | +      | -        | -      | -     | -       | 2             |
| P3     | DBH1-1-3-5  | M   | 1 Yr | -       | -      | -        | +      | -     | -       | 1             |
| P4     | DBH1-1-3-6  | M   | 1 Yr | +       | +      | -        | +      | -     | -       | 3             |
| P5     | DBH1-1-3-7  | M   | 1 Yr | -       | -      | +        | -      | -     | -       | 1             |
| P6     | DBH1-1-3-8  | M   | 1 Yr | -       | -      | -        | +      | -     | -       | 1             |
| P7     | DBJ0-1-3-5  | M   | 1 Yr | +       | -      | -        | +      | -     | -       | 2             |
| P8     | DBJ0-1-3-6  | M   | 1 Yr | +       | +      | +        | +      | -     | -       | 4             |
| P9     | DBJ0-1-3-7  | M   | 1 Yr | +       | +      | +        |        | -     | -       | 3             |
| P10    | DBS1-1-4-7  | M   | 1 Yr | -       | -      | +        | +      | -     | -       | 2             |
| P11    | DBS1-1-4-8  | M   | 1 Yr | -       | +      |          | -      | -     | -       | 1             |
| P12    | DBS0-1-5-1  | M   | 1 Yr |         | +      | +        | -      | -     | -       | 2             |
| P13    | DBS0-1-5-2  | M   | 1 Yr |         | -      | +        | -      | -     | -       | 1             |
| P14    | DBS0-1-5-10 | M   | 1 Yr |         |        |          |        | -     | -       |               |
| LP1    | DLBB1-1-1-3 | M   | 1 Yr | -       | +      | -        | +      | -     | -       | 2             |
| LP2    | DLBB1-1-1-4 | M   | 1 Yr | +       | -      |          |        | -     | -       | 1             |
| LP3    | DLBB1-1-1-5 | M   | 1 Yr | +       |        |          |        | -     | -       | 1             |
| LP4    | DLBB1-1-1-6 | M   | 1 Yr | +       |        |          |        | -     | -       | 1             |
| LP5    | DLBB1-1-1-7 | M   | 1 Yr | +       |        |          |        | -     | -       | 1             |
| LP6    | DLBB1-1-1-8 | M   | 1 Yr | -       |        |          |        | -     | -       |               |
| LP7    | DLBB1-1-1-9 | M   | 1 Yr | -       | +      | +        | +      | -     | -       | 3             |
| LP8    | DLBS0-1-2-5 | M   | 1 Yr | -       | +      | +        | +      | -     | -       | 3             |
| LP9    | DLBS0-1-2-6 | M   | 1 Yr | -       | +      |          | -      | -     | -       | 1             |
| LP10   | DLBS0-1-2-7 | M   | 1 Yr | -       | -      |          |        | -     | -       |               |

| Animal | Animal ID    | Sex | Age  | Puberty | Testis | Prostate | Kidney | Tumor | Obesity | Total Disease |
|--------|--------------|-----|------|---------|--------|----------|--------|-------|---------|---------------|
| LP11   | DLBW1-1-3-4  | M   | 1 Yr | -       |        |          |        | -     | -       |               |
| LP12   | DLBW1-1-3-5  | M   | 1 Yr | -       | -      | -        | -      | -     | -       |               |
| LP13   | DLBW1-1-3-6  | M   | 1 Yr | -       |        |          |        | -     | -       |               |
| LP14   | DLBW1-1-3-7  | M   | 1 Yr | -       |        |          |        | -     | -       |               |
| LP15   | DLBW1-1-3-8  | M   | 1 Yr | -       |        |          |        | -     | -       |               |
| LP16   | DLBW1-1-3-9  | M   | 1 Yr | -       |        |          |        | -     | -       |               |
| LP17   | DLBW1-1-3-10 | M   | 1 Yr | -       | -      | +        | +      | -     | -       | 2             |
| LP18   | DLBG0-1-4-1  | M   | 1 Yr | -       | -      | -        | +      | +     | -       | 2             |
| LP19   | DLBJ2-1-4-8  | M   | 1 Yr | -       |        |          |        | -     | -       |               |
| LP20   | DLBJ2-1-4-9  | M   | 1 Yr | -       |        |          |        | -     | -       |               |
| LP21   | DLBJ2-1-4-11 | M   | 1 Yr | -       |        |          |        | -     | -       |               |
| LP22   | DLBT2-1-5-10 | M   | 1 Yr | +       |        |          |        | -     | -       | 1             |
| LP23   | DLBF2-1-6-4  | M   | 1 Yr | +       |        |          | +      | -     | -       | 2             |
| LP24   | DLBF2-1-6-5  | M   | 1 Yr | +       | -      | +        | -      | -     | -       | 2             |
| LP25   | DLBF2-1-6-6  | M   | 1 Yr | +       |        |          |        | -     | -       | 1             |
| LP26   | DLBF2-1-6-7  | M   | 1 Yr | +       |        |          |        | -     | -       | 1             |
| LP27   | DLBF2-1-6-8  | M   | 1 Yr | -       |        |          |        | +     | -       | 1             |
| LP28   | DLBT0-1-7-12 | M   | 1 Yr | -       |        |          | -      | -     | -       |               |
| LP29   | DLBT0-1-7-13 | M   | 1 Yr | -       | -      | +        | -      | -     | -       | 1             |
| LP30   | DLBH0-1-8-3  | M   | 1 Yr | -       |        |          | +      | -     | -       | 1             |
| LP31   | DLBH0-1-8-4  | M   | 1 Yr | -       |        |          |        | -     | -       |               |
| LP32   | DLBH0-1-8-5  | M   | 1 Yr | -       | -      | +        | -      | -     | -       | 1             |
| LP33   | DLBK0-1-9-10 | M   | 1 Yr | +       | -      | +        | +      | -     | -       | 3             |
| LP34   | DLBK0-1-9-11 | M   | 1 Yr | +       | -      | +        |        | -     | -       | 2             |
| LP35   | DLBK0-1-9-12 | M   | 1 Yr | +       |        |          |        | -     | -       | 1             |
| LP36   | DLBK0-1-9-13 | M   | 1 Yr | +       |        |          |        | -     | -       | 1             |

| Animal | Animal ID    | Sex | Age  | Puberty | Testis | Prostate | Kidney | Tumor | Obesity | Total Disease |
|--------|--------------|-----|------|---------|--------|----------|--------|-------|---------|---------------|
| LP37   | DLBK0-1-9-14 | M   | 1 Yr | +       | -      | -        | -      | -     | -       | 1             |
| LP38   | DLBJ0-1-10-6 | M   | 1 Yr | -       | -      | -        | -      | -     | -       |               |
| LP39   | DLBJ0-1-10-7 | M   | 1 Yr | +       | -      | +        | -      | -     | -       | 2             |
| LP40   | DLBJ0-1-10-8 | M   | 1 Yr | +       | -      | -        | -      | -     | -       | 1             |
| LP41   | DLBA2-1-11-3 | M   | 1 Yr | +       | -      | +        | -      | -     | -       | 2             |
| LP42   | DLBA2-1-11-4 | M   | 1 Yr | +       | -      | -        | -      | -     | -       | 1             |
| LP43   | DLBA2-1-11-5 | M   | 1 Yr | +       | -      | -        | -      | -     | -       | 1             |
| LP44   | DLBA2-1-11-6 | M   | 1 Yr | +       | -      | -        | -      | -     | -       | 1             |
| LP45   | DLBB1-1-12-2 | M   | 1 Yr | -       | -      | -        | +      | -     | -       | 1             |
| LP46   | DLBB1-1-12-3 | M   | 1 Yr | -       | -      | -        | -      | -     | -       |               |

A '+' indicates the presence; A '-' indicates the absence of disease; A blank cell indicates 'not determined.' Animal IDs with a 'C' belong to control group, those with a 'P' belong to plastics group and those with a 'LP' belong to lower dose plastics group. See 'Materials and Methods' section for disease assessment in rats. The number of animals per litter (litter representation) mean  $\pm$  SEM used for each specific disease/abnormality assessment between the control versus plastic or lower dose plastic lineages were not found to be statistically different ( $p > 0.05$ ), so no litter bias detected.
