# Supplementary material for: Plastics Derived Endocrine Disruptors (BPA, DEHP and DBP) Induce Epigenetic Transgenerational Inheritance of Obesity, Reproductive Disease and Sperm Epimutations
Source: PubMed Central journal article supplement (PMC3554682; doi:10.1371/journal.pone.0055387), 2013-01-24
Supplement: pone.0055387.s005.pdf [file pone.0055387.s005.pdf]

**Supplemental Table S3A.** Individual Disease Incidence in F3 Generation Control, Plastics and Lower Dose Plastics Female Rats.

| Animal | Animal ID   | Sex | Age   | Kidney | Tumor | Obesity | Total Disease |
|--------|-------------|-----|-------|--------|-------|---------|---------------|
| C1     | DCF1-3-1-2  | F   | 1 Yr  | -      | -     | -       |               |
| C2     | DCF1-3-1-3  | F   | 1 Yr  | -      | -     | -       |               |
| C3     | DCF1-3-1-4  | F   | 1 Yr  | -      | -     | -       |               |
| C4     | DCF1-3-1-5  | F   | 1 Yr  |        | -     | -       |               |
| C5     | DCS0-3-2-2  | F   | 1 Yr  | -      | -     | -       |               |
| C6     | DCS0-3-2-3  | F   | 1 Yr  | -      | -     | -       |               |
| C7     | DCS0-3-2-4  | F   | 1 Yr  |        | -     | -       |               |
| C8     | DCS0-3-2-5  | F   | 1 Yr  |        | -     | -       |               |
| C9     | DCL1-3-3-2  | F   | 1 Yr  | +      | -     | -       | 1             |
| C10    | DCL1-3-3-3  | F   | 1 Yr  |        | +     | -       | 1             |
| C11    | DCB1-3-4-2  | F   | 1 Yr  | -      | -     | -       |               |
| C12    | DCB1-3-4-3  | F   | 1 Yr  | -      | -     | -       |               |
| C13    | DCB1-3-4-4  | F   | 1 Yr  | -      | -     | -       |               |
| C14    | DCB1-3-4-5  | F   | 1 Yr  |        | -     | -       |               |
| C15    | DCB1-3-4-6  | F   | 1 Yr  |        | -     | -       |               |
| C16    | DCS0-3-5-2  | F   | 1 Yr  | +      | -     | -       | 1             |
| C17    | DCS0-3-5-3  | F   | 1 Yr  | -      | -     | -       |               |
| C18    | DCS0-3-5-4  | F   | 1 Yr  | -      | -     | -       |               |
| C19    | DCS0-3-5-5  | F   | 1 Yr  | -      | -     | -       |               |
| C20    | DCS0-3-5-6  | F   | 1 Yr  |        | -     | -       |               |
| C21    | DCS0-3-6-2  | F   | 1 Yr  | +      | -     | -       | 1             |
| C22    | DCS0-3-6-3  | F   | 1 Yr  | -      | -     | -       |               |
| C23    | DCB1-3-7-2  | F   | 1 Yr  |        | -     | -       |               |
| C24    | DCB1-3-7-3  | F   | 1 Yr  | -      | -     | -       |               |
| C25    | DCB1-3-7-4  | F   | 1 Yr  |        | -     | -       |               |
| C26    | DCB1-3-7-5  | F   | 1 Yr  |        | -     | -       |               |
| C27    | DCB1-3-7-6  | F   | 1 Yr  |        | -     | -       |               |
| C28    | DCR1-3-8-2  | F   | 1 Yr  |        | -     | -       |               |
| C29    | DCR1-3-8-3  | F   | 1 Yr  | -      | -     | -       |               |
| C30    | DCR1-3-8-4  | F   | 1 Yr  | -      | -     | -       |               |
| C31    | DCR1-3-8-5  | F   | 1 Yr  |        | -     | -       |               |
| C32    | DCF1-3-9-2  | F   | 1 Yr  |        | -     | -       |               |
| C33    | DCF1-3-9-3  | F   | 1 Yr  | -      | -     | -       |               |
| C34    | DCF1-3-9-4  | F   | 1 Yr  | -      | -     | -       |               |
| C35    | DCF1-3-9-5  | F   | 1 Yr  |        | -     | -       |               |
| C36    | DCB1-3-10-2 | F   | 1 Yr  |        | -     | -       |               |
| C37    | DCB1-3-10-3 | F   | 1 Yr  | -      | -     | -       |               |
| C38    | DCB1-3-10-4 | F   | 1 Yr  | -      | -     | -       |               |
| C39    | DCL1-3-11-2 | F   | 10 m. |        | +     | -       | 1             |
| C40    | DCL1-3-11-3 | F   | 1 Yr  | -      | -     | -       |               |
| C41    | DCL1-3-11-4 | F   | 1 Yr  | -      | -     | -       |               |
| C42    | DCL1-3-11-5 | F   | 1 Yr  | -      | -     | -       |               |
| C43    | DCL1-3-11-6 | F   | 1 Yr  |        | -     | -       |               |
| C44    | DCL1-3-11-8 | F   | 11 m. |        | +     | -       | 1             |
| C45    | DCB1-3-12-2 | F   | 1 Yr  |        | -     | -       |               |

| Animal | Animal ID   | Sex | Age   | Kidney | Tumor | Obesity | Total Disease |
|--------|-------------|-----|-------|--------|-------|---------|---------------|
| C46    | DCB1-3-12-3 | F   | 1 Yr  | -      | -     | -       |               |
| C47    | DCL1-3-13-1 | F   | 1 Yr  | -      | -     | -       |               |
| C48    | DCL1-3-13-2 | F   | 1 Yr  |        | -     | -       |               |
| C49    | DCL1-3-13-3 | F   | 1 Yr  | -      | -     | -       |               |
| C50    | DCS0-3-14-2 | F   | 1 Yr  |        | -     | -       |               |
| C51    | DCS0-3-14-3 | F   | 1 Yr  | -      | -     | -       |               |
| C52    | DCL1-3-15-2 | F   | 1 Yr  | -      | -     | -       |               |
| C53    | DCL1-3-15-3 | F   | 1 Yr  | +      | -     | -       | 1             |
| C54    | DCL1-3-15-4 | F   | 1 Yr  | +      | -     | -       | 1             |
| C55    | DCL1-3-15-5 | F   | 1 Yr  |        | -     | -       |               |
| C56    | DCS0-3-16-2 | F   | 1 Yr  |        | -     | -       |               |
| C57    | DCS0-3-16-3 | F   | 1 Yr  | -      | -     | -       |               |
| C58    | DCS0-3-16-4 | F   | 1 Yr  | -      | -     | -       |               |
| C59    | DCS0-3-16-5 | F   | 1 Yr  |        | -     | -       |               |
| C60    | DCR1-3-17-1 | F   | 1 Yr  |        | -     | -       |               |
| C61    | DCR1-3-17-2 | F   | 1 Yr  | -      | -     | -       |               |
| C62    | DCR1-3-17-3 | F   | 1 Yr  | -      | -     | -       |               |
| C63    | DCR1-3-17-4 | F   | 1 Yr  |        | -     | -       |               |
| C64    | DCS0-3-18-2 | F   | 1 Yr  |        | -     | -       |               |
| C65    | DCS0-3-18-3 | F   | 1 Yr  | -      | -     | -       |               |
| C66    | DCS0-3-18-4 | F   | 1 Yr  | -      | -     | -       |               |
| C67    | DCF1-3-19-1 | F   | 1 Yr  |        | -     | -       |               |
| C68    | DCF1-3-19-2 | F   | 1 Yr  | -      | -     | -       |               |
| C69    | DCF1-3-19-3 | F   | 11 m. |        | +     | -       | 1             |
| P1     | DBJ0-3-1-2  | F   | 7 m.  |        | -     | -       |               |
| P2     | DBJ0-3-1-3  | F   | 1 Yr  | -      | -     | -       |               |
| P3     | DBJ0-3-1-4  | F   | 7 m.  |        | +     | -       | 1             |
| P4     | DBJ0-3-1-5  | F   | 1 Yr  | -      | -     | -       |               |
| P5     | DBJ0-3-1-6  | F   | 1 Yr  | -      | -     | -       |               |
| P6     | DBM1-3-2-2  | F   | 1 Yr  | -      | -     | -       |               |
| P7     | DBM1-3-2-3  | F   | 1 Yr  | -      | -     | -       |               |
| P8     | DBS1-3-3-2  | F   | 1 Yr  | -      | -     | -       |               |
| P9     | DBS1-3-3-3  | F   | 1 Yr  | +      | -     | -       | 1             |
| P10    | DBS1-3-3-4  | F   | 1 Yr  | -      | -     | -       |               |
| P11    | DBJ0-3-4-2  | F   | 1 Yr  | +      | -     | -       | 1             |
| P12    | DBJ0-3-4-3  | F   | 1 Yr  | -      | -     | -       |               |
| P13    | DBJ0-3-4-4  | F   | 1 Yr  |        | -     | -       |               |
| P14    | DBJ0-3-4-5  | F   | 1 Yr  |        | +     | -       | 1             |
| P15    | DBJ0-3-4-6  | F   | 1 Yr  |        | -     | -       |               |
| P16    | DBL2-3-5-2  | F   | 10 m. |        | -     | -       |               |
| P17    | DBL2-3-5-3  | F   | 1 Yr  | -      | +     | -       | 1             |
| P18    | DBL2-3-5-4  | F   | 1 Yr  | +      | -     | -       | 1             |
| P19    | DBL2-3-5-5  | F   | 1 Yr  | -      | -     | -       |               |
| P20    | DBM1-3-6-2  | F   | 1 Yr  | -      | -     | -       |               |
| P21    | DBM1-3-6-3  | F   | 1 Yr  | -      | -     | -       |               |
| P22    | DBL2-3-7-2  | F   | 1 Yr  | -      | -     | -       |               |
| P23    | DBL2-3-7-3  | F   | 1 Yr  | -      | +     | -       | 1             |

| Animal | Animal ID    | Sex | Age   | Kidney | Tumor | Obesity | Total Disease |
|--------|--------------|-----|-------|--------|-------|---------|---------------|
| P24    | DBL2-3-7-4   | F   | 1 Yr  | -      | -     | -       |               |
| P25    | DBM1-3-8-2   | F   | 1 Yr  | -      | -     | -       |               |
| P26    | DBM1-3-8-3   | F   | 1 Yr  | -      | -     | -       |               |
| P27    | DBJ0-3-9-2   | F   | 1 Yr  | -      | -     | -       |               |
| P28    | DBJ0-3-9-3   | F   | 1 Yr  | -      | -     | -       |               |
| P29    | DBH1-3-10-3  | F   | 1 Yr  | +      | -     | -       | 1             |
| P30    | DBH1-3-10-4  | F   | 1 Yr  | -      | -     | -       |               |
| P31    | DBH1-3-10-5  | F   | 1 Yr  | -      | -     | -       |               |
| P32    | DBM1-3-11-3  | F   | 1 Yr  | -      | -     | -       |               |
| P33    | DBM1-3-11-4  | F   | 1 Yr  | -      | -     | -       |               |
| P34    | DBM1-3-11-5  | F   | 1 Yr  | -      | +     | -       | 1             |
| P35    | DBM1-3-11-6  | F   | 1 Yr  | -      | -     | -       |               |
| P36    | DBH1-3-12-3  | F   | 1 Yr  | -      | -     | -       |               |
| P37    | DBH1-3-12-4  | F   | 1 Yr  | +      | -     | -       | 1             |
| P38    | DBH1-3-12-5  | F   | 1 Yr  | -      | -     | -       |               |
| P39    | DBL2-3-13-2  | F   | 1 Yr  | -      | -     | -       |               |
| P40    | DBL2-3-13-3  | F   | 1 Yr  | +      | -     | -       | 1             |
| P41    | DBH1-3-14-1  | F   | 10 m. | -      | -     | -       |               |
| P42    | DBH1-3-14-2  | F   | 1 Yr  | -      | -     | -       |               |
| P43    | DBH1-3-14-3  | F   | 1 Yr  | -      | -     | -       |               |
| LP1    | DLBF2-3-1-6  | F   | 1 Yr  | -      | -     | -       |               |
| LP2    | DLBF2-3-1-7  | F   | 1 Yr  | -      | -     | -       |               |
| LP3    | DLBF2-3-1-8  | F   | 1 Yr  | +      | -     | -       | 1             |
| LP4    | DLBB1-3-2-4  | F   | 1 Yr  | -      | -     | -       |               |
| LP5    | DLBB1-3-2-5  | F   | 1 Yr  | -      | -     | -       |               |
| LP6    | DLBB1-3-2-6  | F   | 1 Yr  | +      | -     | -       | 1             |
| LP7    | DLBJ2-3-3-3  | F   | 1 Yr  | -      | -     | -       |               |
| LP8    | DLBJ2-3-4-4  | F   | 9 m.  | -      | -     | -       |               |
| LP9    | DLBJ2-3-4-6  | F   | 1 Yr  | -      | -     | -       |               |
| LP10   | DLBJ2-3-4-7  | F   | 1 Yr  | -      | -     | -       |               |
| LP11   | DLBF2-3-5-3  | F   | 9 m.  | -      | +     | -       | 1             |
| LP12   | DLBF2-3-5-4  | F   | 1 Yr  | -      | -     | -       |               |
| LP13   | DLBF2-3-5-5  | F   | 1 Yr  | -      | -     | -       |               |
| LP14   | DLBF2-3-5-6  | F   | 1 Yr  | -      | -     | -       |               |
| LP15   | DLBH0-3-6-6  | F   | 1 Yr  | -      | -     | -       |               |
| LP16   | DLBH0-3-6-7  | F   | 1 Yr  | -      | -     | -       |               |
| LP17   | DLBH0-3-7-7  | F   | 1 Yr  | -      | -     | -       |               |
| LP18   | DLBH0-3-7-8  | F   | 1 Yr  | -      | -     | -       |               |
| LP19   | DLBJ2-3-8-4  | F   | 1 Yr  | -      | -     | -       |               |
| LP20   | DLBW1-3-9-4  | F   | 1 Yr  | -      | -     | -       |               |
| LP21   | DLBW1-3-9-5  | F   | 1 Yr  | -      | -     | -       |               |
| LP22   | DLBF2-3-10-6 | F   | 1 Yr  | -      | -     | -       |               |
| LP23   | DLBF2-3-10-7 | F   | 1 Yr  | -      | -     | +       | 1             |
| LP24   | DLBF2-3-10-8 | F   | 1 Yr  | -      | -     | -       |               |
| LP25   | DLBS0-3-11-3 | F   | 9 m.  | -      | -     | -       |               |
| LP26   | DLBS0-3-11-4 | F   | 1 Yr  | -      | -     | -       |               |
| LP27   | DLBS0-3-11-5 | F   | 1 Yr  | -      | -     | -       |               |

| Animal | Animal ID    | Sex | Age  | Kidney | Tumor | Obesity | Total Disease |
|--------|--------------|-----|------|--------|-------|---------|---------------|
| LP28   | DLBS0-3-12-4 | F   | 9 m. |        | -     | -       |               |
| LP29   | DLBS0-3-12-5 | F   | 9 m. |        | -     | -       |               |
| LP30   | DLBS0-3-12-7 | F   | 1 Yr | -      | -     | -       |               |
| LP31   | DLBS0-3-12-8 | F   | 1 Yr | -      | -     | -       |               |
| LP32   | DLBS0-3-12-9 | F   | 1 Yr | -      | -     | -       |               |
| LP33   | DLBW1-3-13-2 | F   | 9 m. |        | -     | +       | 1             |
| LP34   | DLBW1-3-13-3 | F   | 1 Yr | -      | -     | -       |               |
| LP35   | DLBB1-3-14-2 | F   | 9 m. |        | -     | +       | 1             |
| LP36   | DLBB1-3-14-5 | F   | 1 Yr | -      | -     | -       |               |
| LP37   | DLBB1-3-14-6 | F   | 1 Yr | -      | -     | -       |               |
| LP38   | DLBB1-3-14-7 | F   | 1 Yr | -      | -     | -       |               |
| LP39   | DLBB1-3-15-4 | F   | 1 Yr | -      | -     | -       |               |
| LP40   | DLBB1-3-15-5 | F   | 1 Yr | -      | -     | -       |               |
| LP41   | DLBB1-3-15-6 | F   | 1 Yr | -      | -     | -       |               |
| LP42   | DLBB1-3-16-1 | F   | 1 Yr | -      | -     | -       |               |
| LP43   | DLBB1-3-16-4 | F   | 1 Yr | -      | -     | -       |               |
| LP44   | DLBJ2-3-17-1 | F   | 1 Yr | -      | -     | -       |               |
| LP45   | DLBJ2-3-17-4 | F   | 1 Yr | -      | -     | -       |               |
| LP46   | DLBJ2-3-17-5 | F   | 1 Yr | -      | -     | -       |               |
| LP47   | DLBW1-3-18-1 | F   | 1 Yr | -      | -     | -       |               |
| LP48   | DLBW1-3-18-4 | F   | 1 Yr | -      | -     | -       |               |
| LP49   | DLBW1-3-18-5 | F   | 1 Yr | -      | -     | -       |               |
| LP50   | DLBW1-3-18-6 | F   | 1 Yr | -      | -     | -       |               |
| LP51   | DLBW1-3-19-1 | F   | 1 Yr | -      | -     | +       | 1             |
| LP52   | DLBW1-3-19-4 | F   | 1 Yr | -      | -     | +       | 1             |

The '+' indicates the presence and the '-' indicates the absence of disease. Animal IDs with a 'C' belong to Control group, those with a 'P' belong to Plastics group, and those with a 'LP' belong to Lower Dose Plastics group. See 'Materials and Methods' section for disease assessment in rats. The number of animals per litter (litter representation) mean  $\pm$  SEM used for each specific disease/abnormality assessment between the control versus plastic or lower dose plastic lineages were not found to be statistically different ( $p > 0.05$ ), so no litter bias detected.

**Supplemental Table S3B.** Individual Disease Incidence in F3 Generation Control, Plastics and Lower Dose Plastics Male Rats.

| Animal | Animal ID    | Sex | Age   | Testis | Prostate | Kidney | Tumor | Obesity | Total Disease |
|--------|--------------|-----|-------|--------|----------|--------|-------|---------|---------------|
| C1     | DCF1-3-1-8   | M   | 1 Yr  | +      |          | -      | -     | -       | +             |
| C2     | DCF1-3-1-9   | M   | 1 Yr  |        | -        | -      | -     | -       |               |
| C3     | DCF1-3-1-10  | M   | 1 Yr  |        | -        | +      | -     | -       | +             |
| C4     | DCS0-3-2-11  | M   | 1 Yr  | -      | -        | -      | -     | -       |               |
| C5     | DCS0-3-2-12  | M   | 1 Yr  | -      | -        | -      | -     | -       |               |
| C6     | DCS0-3-2-13  | M   | 1 Yr  | -      |          | -      | -     | -       |               |
| C7     | DCL1-3-3-6   | M   | 1 Yr  | -      | -        |        | -     | -       |               |
| C8     | DCL1-3-3-7   | M   | 1 Yr  | -      | -        |        | -     | -       |               |
| C9     | DCB1-3-4-9   | M   | 1 Yr  | -      | +        | -      | -     | -       | 1             |
| C10    | DCB1-3-4-10  | M   | 1 Yr  | -      | -        | -      | -     | -       |               |
| C11    | DCB1-3-4-11  | M   | 1 Yr  | -      | -        | -      | -     | -       |               |
| C12    | DCB1-3-4-12  | M   | 1 Yr  |        |          |        | -     | -       |               |
| C13    | DCB1-3-4-13  | M   | 1 Yr  |        |          |        | -     | -       |               |
| C14    | DCS0-3-5-9   | M   | 1 Yr  | -      |          | -      | -     | -       |               |
| C15    | DCS0-3-5-10  | M   | 1 Yr  | -      | -        | -      | -     | -       |               |
| C16    | DCS0-3-5-11  | M   | 1 Yr  | -      | -        | -      | -     | -       |               |
| C17    | DCS0-3-6-6   | M   | 1 Yr  | -      |          | -      | -     | -       |               |
| C18    | DCS0-3-6-7   | M   | 1 Yr  | -      | -        | -      | -     | -       |               |
| C19    | DCS0-3-6-8   | M   | 1 Yr  | +      | -        | -      | -     | -       | 1             |
| C20    | DCB1-3-7-9   | M   | 1 Yr  | -      |          | +      | -     | -       | 1             |
| C21    | DCB1-3-7-10  | M   | 1 Yr  | -      | -        | -      | -     | -       |               |
| C22    | DCB1-3-7-11  | M   | 1 Yr  | -      | -        | -      | -     | -       |               |
| C23    | DCR1-3-8-7   | M   | 1 Yr  | -      | -        | -      | -     | -       |               |
| C24    | DCR1-3-8-8   | M   | 1 Yr  | -      | -        | -      | -     | -       |               |
| C25    | DCF1-3-9-11  | M   | 1 Yr  | -      | -        |        | -     | -       |               |
| C26    | DCF1-3-9-12  | M   | 1 Yr  | -      |          |        | -     | -       |               |
| C27    | DCF1-3-9-13  | M   | 1 Yr  | -      |          |        | -     | -       |               |
| C28    | DCB1-3-10-9  | M   | 9 m.  | -      | -        | -      | +     | -       | 1             |
| C29    | DCB1-3-10-10 | M   | 1 Yr  |        | -        | -      | -     | -       |               |
| C30    | DCB1-3-10-11 | M   | 1 Yr  | -      | -        | -      | -     | -       |               |
| C31    | DCB1-3-10-12 | M   | 1 Yr  | +      | -        | -      | -     | -       | 1             |
| C32    | DCB1-3-10-13 | M   | 11 m. |        | -        |        | +     | -       | 1             |
| C33    | DCL1-3-11-9  | M   | 1 Yr  | -      |          | -      | -     | -       |               |
| C34    | DCL1-3-11-10 | M   | 1 Yr  | -      | +        | -      | -     | -       | 1             |
| C35    | DCL1-3-11-11 | M   | 1 Yr  | -      | -        | -      | -     | -       |               |
| C36    | DCB1-3-12-6  | M   | 1 Yr  | -      | -        | -      | -     | -       |               |
| C37    | DCB1-3-12-7  | M   | 1 Yr  | +      | +        | -      | -     | -       | 2             |
| C38    | DCB1-3-12-8  | M   | 1 Yr  | +      | -        | -      | -     | -       | 1             |
| C39    | DCL1-3-13-4  | M   | 1 Yr  | -      | -        | -      | -     | -       |               |
| C40    | DCS0-3-14-5  | M   | 1 Yr  | -      | -        | -      | -     | -       |               |
| C41    | DCS0-3-14-6  | M   | 1 Yr  | -      | -        |        | -     | -       |               |
| C42    | DCS0-3-14-7  | M   | 1 Yr  | -      | -        | -      | -     | -       |               |
| C43    | DCL1-3-15-7  | M   | 1 Yr  | -      | -        | -      | -     | -       |               |
| C44    | DCL1-3-15-8  | M   | 1 Yr  | -      | +        | -      | -     | -       | 1             |

| Animal | Animal ID    | Sex | Age  | Testis | Prostate | Kidney | Tumor | Obesity | Total Disease |
|--------|--------------|-----|------|--------|----------|--------|-------|---------|---------------|
| C45    | DCL1-3-15-9  | M   | 1 Yr | -      | -        | -      | -     | -       |               |
| C46    | DCS0-3-16-9  | M   | 1 Yr | -      | -        | -      | -     | -       |               |
| C47    | DCS0-3-16-10 | M   | 1 Yr | -      | -        | -      | -     | -       |               |
| C48    | DCS0-3-16-11 | M   | 1 Yr | -      | -        | -      | -     | -       |               |
| C49    | DCS0-3-16-13 | M   | 1 Yr | -      | -        | -      | -     | -       |               |
| C50    | DCR1-3-17-6  | M   | 1 Yr | -      | -        | -      | -     | -       |               |
| C51    | DCS0-3-18-10 | M   | 1 Yr | -      | -        | +      | -     | -       | 1             |
| C52    | DCS0-3-18-11 | M   | 1 Yr | +      | -        | +      | -     | -       | 2             |
| C53    | DCS0-3-18-12 | M   | 1 Yr | -      | -        | -      | -     | -       |               |
| C54    | DCF1-3-19-4  | M   | 1 Yr | -      | -        | -      | -     | -       |               |
| C55    | DCF1-3-19-5  | M   | 1 Yr | -      | -        | -      | -     | -       |               |
| C56    | DCF1-3-19-6  | M   | 1 Yr | -      | -        | -      | -     | -       |               |
| P1     | DBJ0-3-1-9   | M   | 1 Yr | -      | -        | -      | -     | -       |               |
| P2     | DBJ0-3-1-10  | M   | 1 Yr | -      | -        | -      | -     | -       |               |
| P3     | DBJ0-3-1-11  | M   | 1 Yr | -      | -        | +      | -     | -       | 1             |
| P4     | DBJ0-3-1-12  | M   | 1 Yr | -      | -        | -      | -     | -       |               |
| P5     | DBM1-3-2-6   | M   | 1 Yr | -      | -        | -      | -     | -       |               |
| P6     | DBM1-3-2-7   | M   | 8 m. | -      | -        | -      | +     | -       | 1             |
| P7     | DBM1-3-2-8   | M   | 1 Yr | -      | -        | +      | -     | -       | 1             |
| P8     | DBM1-3-2-9   | M   | 1 Yr | -      | +        | -      | -     | -       | 1             |
| P9     | DBS1-3-3-10  | M   | 1 Yr | -      | -        | -      | -     | -       |               |
| P10    | DBJ0-3-4-9   | M   | 1 Yr | -      | -        | +      | -     | -       | 1             |
| P11    | DBJ0-3-4-10  | M   | 1 Yr | -      | +        | +      | -     | -       | 2             |
| P12    | DBJ0-3-4-11  | M   | 1 Yr | +      | +        | -      | -     | -       | 2             |
| P13    | DBJ0-3-4-13  | M   | 1 Yr | -      | -        | -      | -     | -       |               |
| P14    | DBL2-3-5-8   | M   | 1 Yr | -      | -        | -      | -     | -       |               |
| P15    | DBL2-3-5-9   | M   | 1 Yr | -      | -        | -      | -     | -       |               |
| P16    | DBL2-3-5-10  | M   | 1 Yr | -      | -        | -      | -     | -       |               |
| P17    | DBM1-3-6-5   | M   | 1 Yr | -      | -        | -      | -     | -       |               |
| P18    | DBM1-3-6-6   | M   | 1 Yr | -      | -        | -      | -     | -       |               |
| P19    | DBM1-3-6-7   | M   | 1 Yr | -      | -        | -      | -     | -       |               |
| P20    | DBL2-3-7-9   | M   | 1 Yr | -      | -        | -      | -     | -       |               |
| P21    | DBL2-3-7-10  | M   | 10 m | -      | -        | -      | +     | -       | 1             |
| P22    | DBL2-3-7-11  | M   | 1 Yr | -      | -        | +      | -     | -       | 1             |
| P23    | DBM1-3-8-4   | M   | 1 Yr | -      | -        | -      | -     | +       | 1             |
| P24    | DBM1-3-8-6   | M   | 1 Yr | -      | -        | +      | -     | -       | 1             |
| P25    | DBM1-3-8-7   | M   | 1 Yr | -      | +        | -      | -     | -       | 1             |
| P26    | DBM1-3-8-8   | M   | 1 Yr | -      | -        | -      | -     | -       |               |
| P27    | DBJ0-3-9-5   | M   | 1 Yr | -      | -        | -      | -     | -       |               |
| P28    | DBJ0-3-9-6   | M   | 1 Yr | -      | -        | -      | -     | -       |               |
| P29    | DBJ0-3-9-7   | M   | 1 Yr | -      | -        | -      | -     | -       |               |
| P30    | DBH1-3-10-10 | M   | 1 Yr | -      | -        | -      | -     | -       |               |
| P31    | DBH1-3-10-11 | M   | 1 Yr | -      | -        | +      | -     | -       | 1             |
| P32    | DBH1-3-10-12 | M   | 1 Yr | -      | +        | -      | -     | -       | 1             |
| P33    | DBM1-3-11-10 | M   | 1 Yr | -      | -        | -      | -     | -       |               |
| P34    | DBM1-3-11-11 | M   | 1 Yr | -      | -        | -      | -     | -       |               |

| Animal | Animal ID     | Sex | Age   | Testis | Prostate | Kidney | Tumor | Obesity | Total Disease |
|--------|---------------|-----|-------|--------|----------|--------|-------|---------|---------------|
| P35    | DBH1-3-12-13  | M   | 1 Yr  | -      | +        |        | -     | -       | 1             |
| P36    | DBH1-3-12-14  | M   | 1 Yr  | -      | +        | -      | -     | -       | 1             |
| P37    | DBL2-3-13-6   | M   | 1 Yr  | -      | -        | -      | -     | -       |               |
| P38    | DBH1-3-14-5   | M   | 1 Yr  | -      | -        |        | -     | -       |               |
| P39    | DBH1-3-14-6   | M   | 1 Yr  | +      | -        |        | -     | -       | 1             |
| P40    | DBH1-3-14-7   | M   | 1 Yr  | -      | -        |        | -     | -       |               |
| LP1    | DLBF2-3-1-12  | M   | 1 Yr  | -      | -        | -      | -     | -       |               |
| LP2    | DLBB1-3-2-13  | M   | 1 Yr  | -      | -        | -      | -     | -       |               |
| LP3    | DLBB1-3-2-14  | M   | 1 Yr  | -      | -        | -      | -     | -       |               |
| LP4    | DLBB1-3-2-15  | M   | 1 Yr  | -      | -        | -      | -     | -       |               |
| LP5    | DLBJ2-3-3-7   | M   | 1 Yr  | +      | -        | +      | +     | -       | 3             |
| LP6    | DLBJ2-3-3-8   | M   | 1 Yr  | +      | -        | -      | -     | -       | 1             |
| LP7    | DLBJ2-3-4-14  | M   | 1 Yr  | +      | -        | +      | -     | -       | 2             |
| LP8    | DLBJ2-3-4-15  | M   | 1 Yr  | -      | -        | -      | -     | -       |               |
| LP9    | DLBJ2-3-4-16  | M   | 1 Yr  | -      | +        | -      | -     | -       | 1             |
| LP10   | DLBF2-3-5-12  | M   | 1 Yr  | -      | -        | -      | -     | -       |               |
| LP11   | DLBF2-3-5-13  | M   | 1 Yr  |        |          |        | +     | -       | 1             |
| LP12   | DLBF2-3-5-14  | M   | 1 Yr  | -      | -        | +      | -     | -       | 1             |
| LP13   | DLBH0-3-6-11  | M   | 1 Yr  | -      | -        | -      | -     | -       |               |
| LP14   | DLBH0-3-6-12  | M   | 1 Yr  | +      | -        | -      | -     | -       | 1             |
| LP15   | DLBH0-3-6-13  | M   | 1 Yr  | -      | -        | -      | -     | +       | 1             |
| LP16   | DLBL2-3-7-12  | M   | 1 Yr  | -      | -        | -      | -     | -       |               |
| LP17   | DLBL2-3-7-13  | M   | 1 Yr  | -      | -        | -      | -     | -       |               |
| LP18   | DLBL2-3-7-14  | M   | 1 Yr  | -      | -        | -      | -     | -       |               |
| LP19   | DLBJ2-3-8-8   | M   | 1 Yr  | -      | -        | -      | -     | -       |               |
| LP20   | DLBJ2-3-8-9   | M   | 1 Yr  | +      | -        | -      | -     | -       | 1             |
| LP21   | DLBJ2-3-8-10  | M   | 1 Yr  | -      | +        | -      | -     | -       | 1             |
| LP22   | DLBW1-3-9-8   | M   | 10 m. | -      |          | -      | +     | -       | 1             |
| LP23   | DLBW1-3-9-9   | M   | 1 Yr  | -      | -        | -      | -     | -       |               |
| LP24   | DLBW1-3-9-10  | M   | 1 Yr  | -      | -        | -      | -     | +       | 1             |
| LP25   | DLBW1-3-9-11  | M   | 1 Yr  | -      | +        | -      | -     | -       | 1             |
| LP26   | DLBF2-3-10-12 | M   | 1 Yr  | -      | -        |        | -     | -       |               |
| LP27   | DLBF2-3-10-13 | M   | 1 Yr  | +      | -        | -      | -     | -       | 1             |
| LP28   | DLBF2-3-10-14 | M   | 1 Yr  | -      | -        | -      | -     | -       |               |
| LP29   | DLBS0-3-11-11 | M   | 1 Yr  | -      | -        | -      | -     | -       |               |
| LP30   | DLBS0-3-11-12 | M   | 1 Yr  | -      | -        | -      | -     | -       |               |
| LP31   | DLBS0-3-11-13 | M   | 1 Yr  | -      | -        | -      | -     | -       |               |
| LP32   | DLBS0-3-11-14 | M   | 1 Yr  | +      | -        | -      | -     | -       | 1             |
| LP33   | DLBS0-3-12-12 | M   | 9 m.  |        |          |        | -     | -       |               |
| LP34   | DLBS0-3-12-13 | M   | 1 Yr  | +      | +        | -      | -     | -       | 2             |
| LP35   | DLBW1-3-13-7  | M   | 1 Yr  | +      | -        | -      | -     | +       | 2             |
| LP36   | DLBB1-3-14-14 | M   | 1 Yr  | +      | -        | -      | -     | +       | 2             |
| LP37   | DLBB1-3-14-15 | M   | 1 Yr  | -      | +        | -      | -     | -       | 1             |
| LP38   | DLBB1-3-14-16 | M   | 1 Yr  | +      | -        | -      | +     | -       | 2             |
| LP39   | DLBB1-3-15-8  | M   | 9 m.  |        |          |        | -     | +       | 1             |
| LP40   | DLBB1-3-15-10 | M   | 1 Yr  | +      | -        | -      | -     | -       | 1             |

| Animal | Animal ID     | Sex | Age  | Testis | Prostate | Kidney | Tumor | Obesity | Total Disease |
|--------|---------------|-----|------|--------|----------|--------|-------|---------|---------------|
| LP41   | DLBB1-3-15-11 | M   | 1 Yr | +      | -        | -      | -     | -       | 1             |
| LP42   | DLBB1-3-16-5  | M   | 9 m. |        |          |        |       |         |               |
| LP43   | DLBB1-3-16-10 | M   | 1 Yr | -      | -        | +      | -     | -       | 1             |
| LP44   | DLBB1-3-16-11 | M   | 1 Yr | -      | -        | -      | -     | -       |               |
| LP45   | DLBJ2-3-17-6  | M   | 1 Yr | -      | -        | -      | -     | -       |               |
| LP46   | DLBJ2-3-17-13 | M   | 1 Yr | +      | -        | -      | -     | -       | 1             |
| LP47   | DLBJ2-3-17-14 | M   | 1 Yr | -      | -        | -      | -     | -       |               |
| LP48   | DLBJ2-3-17-15 | M   | 1 Yr | -      | -        | -      | -     | -       |               |
| LP49   | DLBJ2-3-17-16 | M   | 1 Yr | +      | -        | -      | -     | -       | 1             |
| LP50   | DLBJ2-3-17-17 | M   | 1 Yr | -      | -        | -      | -     | -       |               |
| LP51   | DLBW1-3-18-7  | M   | 1 Yr | +      | -        | -      | -     | -       | 1             |
| LP52   | DLBW1-3-18-10 | M   | 1 Yr | -      | -        | -      | -     | -       |               |
| LP53   | DLBW1-3-18-11 | M   | 1 Yr | +      | -        | -      | -     | -       | 1             |
| LP54   | DLBW1-3-18-12 | M   | 1 Yr | +      | -        | +      | -     | -       | 2             |
| LP55   | DLBW1-3-19-5  | M   | 1 Yr | +      | -        | +      | -     | -       | 2             |
| LP56   | DLBW1-3-19-10 | M   | 1 Yr | -      | +        | -      | -     | -       | 1             |
| LP57   | DLBW1-3-19-11 | M   | 1 Yr | +      | +        | -      | -     | -       | 2             |
| LP58   | DLBW1-3-19-12 | M   | 1 Yr | -      | -        | +      | -     | -       | 1             |

The '+' indicates the presence and the '-' indicates the absence of disease. Animal IDs with a 'C' belong to Control group, those with a 'P' belong to Plastics group, and those with a 'LP' belong to Lower Dose Plastics group. See 'Materials and Methods' section for disease assessment in rats. The number of animals per litter (litter representation) mean  $\pm$  SEM used for each specific disease/abnormality assessment between the control versus plastic or lower dose plastic lineages were not found to be statistically different ( $p > 0.05$ ), so no litter bias detected.
