# Supplementary material for: Plastics Derived Endocrine Disruptors (BPA, DEHP and DBP) Induce Epigenetic Transgenerational Inheritance of Obesity, Reproductive Disease and Sperm Epimutations
Source: PubMed Central journal article supplement (PMC3554682; doi:10.1371/journal.pone.0055387), 2013-01-24
Supplement: pone.0055387.s006.pdf [file pone.0055387.s006.pdf]

**Supplemental Table S4. List of differential methylation regions (DMR) found in F3-generation plastics lineage sperm**

| Gene Symbol             | Chr  | Start     | Stop      | Gene ID   | min p-value | Gene Title                                                               |
|-------------------------|------|-----------|-----------|-----------|-------------|--------------------------------------------------------------------------|
| <b>Apoptosis</b>        |      |           |           |           |             |                                                                          |
| Pdcd11                  | 1    | 252412922 | 252413522 | 309458    | 1.2E-13     | programmed cell death 11                                                 |
| Tnfrsf12a               | 10   | 12941335  | 12942463  | 302965    | 3.5E-12     | tumor necrosis factor receptor superfamily, member 12a                   |
| Higd2a                  | 17   | 16084041  | 16084831  | 290999    | 6.2E-13     | HIG1 hypoxia inducible domain family, member 2A                          |
| <b>Cell Cycle</b>       |      |           |           |           |             |                                                                          |
| Cep55                   | 1    | 242381886 | 242382486 | 294074    | 1.6E-15     | centrosomal protein 55kDa                                                |
| Orc4l                   | 3    | 29851658  | 29852473  | 295596    | 1.8E-10     | origin recognition complex, subunit 4-like (yeast)                       |
| Amn1                    | 4    | 186612094 | 186612807 | 302032    | 7.8E-10     | antagonist of mitotic exit network 1 homolog (S. cerevisiae)             |
| Dock6                   | 8    | 20894272  | 20895072  | 367039    | 9.2E-11     | dedicator of cytokinesis 6                                               |
| Cables1                 | 18   | 3424659   | 3425645   | 307585    | 8.2E-22     | Cdk5 and Abl enzyme substrate 1                                          |
| <b>Cytoskeleton-ECM</b> |      |           |           |           |             |                                                                          |
| Ldb1                    | 1    | 251260561 | 251261161 | 309447    | 2.1E-22     | LIM domain binding 1                                                     |
| Actn3                   | 1    | 207491938 | 207492749 | 171009    | 1.9E-09     | actinin alpha 3                                                          |
| Actl6a                  | 2    | 118919059 | 118919939 | 361925    | 1.3E-11     | actin-like 6A                                                            |
| Tspan33                 | 4    | 56583349  | 56583949  | 500065    | 1.5E-14     | tetraspanin 33                                                           |
| Actg2                   | 4    | 117748353 | 117749060 | 25365     | 3.8E-11     | actin, gamma 2, smooth muscle, enteric                                   |
| Tpm2                    | 5    | 60003516  | 60004592  | 500450    | 2.6E-07     | tropomyosin 2, beta                                                      |
| LOC100363366            | 8    | 30972488  | 30973193  | 100363366 | 3.9E-10     | amyloid beta (A4) precursor-like protein 2-like                          |
| Tpm1                    | 8    | 71356826  | 71357518  | 24851     | 1.4E-13     | tropomyosin 1, alpha                                                     |
| Ncam2                   | 11   | 20423008  | 20423897  | 288280    | 3.8E-09     | neural cell adhesion molecule 2                                          |
| Mcoln1                  | 12   | 2637728   | 2638418   | 288371    | 1.2E-15     | mucolipin 1                                                              |
| Fat1                    | 16   | 50588806  | 50589703  | 83720     | 3.1E-08     | FAT tumor suppressor homolog 1 (Drosophila)                              |
| Spock3                  | 16   | 29751447  | 29752047  | 306404    | 2.5E-06     | sparc/osteonectin, cwcv and kazal-like domains proteoglycan (testican) 3 |
| Tubb2a                  | 17   | 37138997  | 37140410  | 498736    | 1.5E-33     | tubulin, beta 2a                                                         |
| Vim                     | 17   | 87846882  | 87848477  | 81818     | 3.1E-15     | vimentin                                                                 |
| Pcdhb15                 | 18   | 30286538  | 30287543  | 291646    | 5.6E-21     | protocadherin beta 15                                                    |
| Cdh11                   | 19   | 2225447   | 2226332   | 84407     | 1.5E-14     | cadherin 11                                                              |
| Cdh8                    | 19   | 5685525   | 5686520   | 84408     | 9.2E-19     | cadherin 8                                                               |
| Lrg1                    | Un/9 | 25672610  | 25673300  | 367455    | 7.7E-10     | leucine-rich alpha-2-glycoprotein 1                                      |
| Plin5                   | Un/9 | 25672610  | 25673300  | 501283    | 7.7E-10     | perilipin 5                                                              |
| <b>Development</b>      |      |           |           |           |             |                                                                          |
| Dmpk                    | 1    | 78450272  | 78451687  | 308405    | 8.8E-25     | dystrophia myotonica-protein kinase                                      |
| Six5                    | 1    | 78450272  | 78451687  | 308406    | 8.8E-25     | SIX homeobox 5                                                           |
| Sv2b                    | 1    | 130887128 | 130887728 | 117556    | 2.3E-14     | synaptic vesicle glycoprotein 2b                                         |

| Gene Symbol               | Chr | Start     | Stop      | Gene ID | min p-value | Gene Title                                                                                        |
|---------------------------|-----|-----------|-----------|---------|-------------|---------------------------------------------------------------------------------------------------|
| Usmg5                     | 1   | 252412922 | 252413522 | 171069  | 1.2E-13     | up-regulated during skeletal muscle growth 5 homolog (mouse)                                      |
| Dkk2                      | 2   | 229541018 | 229541911 | 295445  | 1.4E-17     | dickkopf homolog 2 (Xenopus laevis)                                                               |
| Ntng1                     | 2   | 205805922 | 205806522 | 295382  | 7.6E-11     | netrin G1                                                                                         |
| Sv2c                      | 2   | 26554292  | 26554989  | 29643   | 3.1E-08     | synaptic vesicle glycoprotein 2c                                                                  |
| Cbln4                     | 3   | 162920485 | 162921468 | 228942  | 9.8E-12     | cerebellin 4 precursor                                                                            |
| Lhx6                      | 3   | 15214211  | 15214897  | 311901  | 9.9E-10     | LIM homeobox 6                                                                                    |
| Ntng2                     | 3   | 8228607   | 8229412   | 311836  | 4.3E-19     | netrin G2                                                                                         |
| SPATA2                    | 3   | 158640784 | 158641479 | 114210  | 1.6E-26     | spermatogenesis associated 2                                                                      |
| SMO                       | 4   | 56653034  | 56653704  | 25273   | 2.2E-12     | smoothened homolog (Drosophila)                                                                   |
| Dfnb31                    | 5   | 80377382  | 80378089  | 313255  | 1.6E-09     | deafness, autosomal recessive 31                                                                  |
| Npc2                      | 6   | 108814406 | 108815606 | 286898  | 1.4E-36     | Niemann-Pick disease, type C2                                                                     |
| Trps1                     | 7   | 87076226  | 87077124  | 299897  | 2.5E-12     | trichorhinophalangeal syndrome I homolog (human)                                                  |
| Sox14                     | 8   | 104731115 | 104731715 | 300954  | 2.1E-09     | SRY (sex determining region Y)-box 14                                                             |
| Per1                      | 10  | 55855898  | 55856498  | 287422  | 4.1E-07     | period circadian protein homolog 1 (Drosophila)                                                   |
| Nlgn2                     | 10  | 56678445  | 56679248  | 117096  | 2.9E-10     | neuroligin 2                                                                                      |
| Hoxb6                     | 10  | 85032294  | 85033304  | 497986  | 3.9E-26     | homeo box B6                                                                                      |
| HOXB3                     | 10  | 85078411  | 85079388  | 303488  | 1.8E-20     | homeo box B3                                                                                      |
| Lhx4                      | 13  | 70704284  | 70705161  | 360858  | 9.0E-12     | LIM homeobox 4                                                                                    |
| Nsg1                      | 14  | 77932142  | 77933147  | 25247   | 2.2E-10     | neuron specific gene family member 1                                                              |
| Irx5                      | 19  | 15751735  | 15752415  | 498918  | 2.6E-10     | iroquois homeobox 5                                                                               |
| <b>Electron Transport</b> |     |           |           |         |             |                                                                                                   |
| Cyp26a1                   | 1   | 241947986 | 241948586 | 154985  | 1.6E-10     | cytochrome P450, family 26, subfamily a, polypeptide 1                                            |
| <b>Epigenetics</b>        |     |           |           |         |             |                                                                                                   |
| Smarca2                   | 1   | 230016032 | 230017142 | 361745  | 1.8E-16     | SWI/SNF related, matrix associated, actin dependent regulator of chromatin, subfamily a, member 2 |
| Dnmt3a                    | 6   | 26859491  | 26860180  | 444984  | 3.9E-13     | DNA (cytosine-5)-methyltransferase 3 alpha                                                        |
| H1f0                      | 7   | 117001533 | 117002342 | 24437   | 4.0E-11     | H1 histone family, member 0                                                                       |
| Satb2                     | 9   | 55824749  | 55825838  | 501145  | 1.4E-13     | SATB homeobox 2                                                                                   |
| Tbx2                      | 10  | 74084425  | 74085225  | 303398  | 6.4E-41     | T-box 2                                                                                           |
| ASMT                      | 12  | 16815952  | 16816847  | 246281  | 3.6E-20     | acetylserotonin O-methyltransferase                                                               |
| Asmtl                     | 12  | 16824203  | 16825214  | 288527  | 1.1E-10     | acetylserotonin O-methyltransferase-like                                                          |
| Kdm2b                     | 12  | 34672398  | 34673309  | 304495  | 1.9E-19     | lysine (K)-specific demethylase 2B                                                                |
| Gadd45g                   | 17  | 19231639  | 19232721  | 291005  | 7.5E-12     | growth arrest and DNA-damage-inducible, gamma                                                     |

| Gene Symbol                       | Chr | Start     | Stop      | Gene ID | min p-value | Gene Title                                                                                |
|-----------------------------------|-----|-----------|-----------|---------|-------------|-------------------------------------------------------------------------------------------|
| <b>Golgi Apparatus</b>            |     |           |           |         |             |                                                                                           |
| Ap2a1                             | 1   | 95403348  | 95404143  | 308578  | 4.4E-11     | adaptor-related protein complex 2, alpha 1 subunit                                        |
| B4galt2                           | 5   | 138346449 | 138347345 | 313536  | 7.2E-07     | UDP-Gal:betaGlcNAc beta 1,4-galactosyltransferase, polypeptide 2                          |
| <b>Growth Factors</b>             |     |           |           |         |             |                                                                                           |
| Fgf15                             | 1   | 205323456 | 205324556 | 170582  | 2.1E-15     | fibroblast growth factor 15                                                               |
| Gdnf                              | 2   | 57403318  | 57404513  | 25453   | 2.5E-25     | glial cell derived neurotrophic factor                                                    |
| Ntf3                              | 4   | 162504664 | 162505639 | 81737   | 3.3E-13     | neurotrophin 3                                                                            |
| WNT10B                            | 7   | 137545980 | 137547070 | 315294  | 1.7E-13     | wingless-type MMTV integration site family, member 10B                                    |
| Sept11                            | 14  | 16548270  | 16549359  | 305227  | 1.7E-11     | septin 11                                                                                 |
| <b>Immune Response</b>            |     |           |           |         |             |                                                                                           |
| Siglec10                          | 1   | 93784998  | 93785998  | 292844  | 4.5E-12     | sialic acid binding Ig-like lectin 10                                                     |
| Tmpo                              | 7   | 28112035  | 28112635  | 25359   | 2.3E-10     | thymopoietin                                                                              |
| Cd276                             | 8   | 62361422  | 62362307  | 315716  | 1.8E-09     | Cd276 molecule                                                                            |
| Lkap                              | 10  | 822060    | 822860    | 170946  | 6.4E-10     | limkain b1                                                                                |
| Fcgr2a                            | 13  | 86913190  | 86913875  | 116591  | 4.1E-10     | Fc fragment of IgG, low affinity IIa, receptor (CD32)                                     |
| RT1-CE7                           | 20  | 3416588   | 3417188   | 368153  | 3.7E-17     | RT1 class I, locus CE7                                                                    |
| C4b                               | 20  | 4103885   | 4104485   | 24233   | 3.9E-11     | complement component 4B                                                                   |
| RT1-A2                            | 20  | 5022398   | 5022998   | 24974   | 1.3E-13     | RT1 class Ia, locus A2                                                                    |
| <b>Metabolism &amp; Transport</b> |     |           |           |         |             |                                                                                           |
| Bcat2                             | 1   | 96038195  | 96038795  | 64203   | 6.3E-07     | branched chain aminotransferase 2, mitochondrial                                          |
| Scd                               | 1   | 249358774 | 249359374 | 83792   | 2.7E-09     | stearoyl-CoA desaturase (delta-9-desaturase)                                              |
| Fah                               | 1   | 140875869 | 140876469 | 29383   | 7.8E-09     | fumarylacetoacetate hydrolase                                                             |
| Kcnn3                             | 2   | 181715841 | 181716441 | 54263   | 4.1E-08     | potassium intermediate/small conductance calcium-activated channel, subfamily N, member 3 |
| Acox1                             | 3   | 115365654 | 115366254 | 296138  | 1.3E-23     | acyl-Coenzyme A oxidase-like                                                              |
| Slc32a1                           | 3   | 149342424 | 149343525 | 83612   | 5.4E-12     | solute carrier family 32 (GABA vesicular transporter), member 1                           |
| Mat2a                             | 4   | 105744842 | 105745527 | 171347  | 4.4E-31     | methionine adenosyltransferase II, alpha                                                  |
| Magi2                             | 4   | 11440081  | 11441061  | 113970  | 7.2E-11     | membrane associated guanylate kinase, WW and PDZ domain containing 2                      |
| Echdc2                            | 5   | 129265151 | 129266066 | 298381  | 5.8E-10     | enoyl Coenzyme A hydratase domain containing 2                                            |
| Dhrs3                             | 5   | 163340874 | 163341672 | 313689  | 8.1E-08     | dehydrogenase/reductase (SDR family) member 3                                             |
| Fut9                              | 5   | 40934221  | 40934821  | 84597   | 1.7E-11     | fucosyltransferase 9 (alpha (1,3) fucosyltransferase)                                     |
| Pusl1                             | 5   | 172749107 | 172749987 | 362681  | 5.4E-10     | pseudouridylate synthase-like 1                                                           |

| Gene Symbol                             | Chr | Start     | Stop      | Gene ID | min p-value | Gene Title                                                                                |
|-----------------------------------------|-----|-----------|-----------|---------|-------------|-------------------------------------------------------------------------------------------|
| Aldh6a1                                 | 6   | 108515786 | 108516671 | 81708   | 8.2E-11     | aldehyde dehydrogenase 6 family, member A1                                                |
| Pygl                                    | 6   | 92340725  | 92341609  | 64035   | 7.8E-10     | phosphorylase, glycogen, liver                                                            |
| Syt10                                   | 7   | 128173824 | 128174714 | 60567   | 2.8E-10     | synaptotagmin X                                                                           |
| Scn3b                                   | 8   | 43230920  | 43231900  | 245956  | 4.3E-08     | sodium channel, voltage-gated, type III, beta                                             |
| Srr                                     | 10  | 62234533  | 62235133  | 303306  | 8.1E-09     | serine racemase                                                                           |
| KCNJ2                                   | 10  | 100568435 | 100569338 | 29712   | 8.0E-10     | potassium inwardly-rectifying channel, subfamily J, member 2                              |
| Nmnat2                                  | 13  | 67969800  | 67970695  | 289095  | 2.5E-11     | nicotinamide nucleotide adenyltransferase 2                                               |
| Tomm40b                                 | 13  | 87111787  | 87112679  | 304971  | 1.0E-11     | translocase of outer mitochondrial membrane 40 homolog B (yeast)                          |
| Enoph1                                  | 14  | 10859038  | 10859932  | 305177  | 6.9E-41     | enolase-phosphatase 1                                                                     |
| Dpysl2                                  | 15  | 46412626  | 46413517  | 25416   | 1.9E-09     | dihydropyrimidinase-like 2                                                                |
| Kcnn2                                   | 18  | 39559856  | 39560646  | 54262   | 5.7E-10     | potassium intermediate/small conductance calcium-activated channel, subfamily N, member 2 |
| Best2                                   | 19  | 24802086  | 24803166  | 364973  | 4.5E-09     | bestrophin 2                                                                              |
| Prps2                                   | X   | 47274725  | 47275523  | 24689   | 1.8E-06     | phosphoribosyl pyrophosphate synthetase 2                                                 |
| <b>Proteolysis</b>                      |     |           |           |         |             |                                                                                           |
| Ube2h                                   | 4   | 57216643  | 57217348  | 296956  | 1.2E-06     | ubiquitin-conjugating enzyme E2H                                                          |
| Metap2                                  | 7   | 31001102  | 31001702  | 64370   | 8.2E-11     | methionyl aminopeptidase 2                                                                |
| Prssl1                                  | 7   | 11424819  | 11425640  | 408241  | 6.1E-18     | protease, serine-like 1                                                                   |
| AMZ2                                    | 10  | 98899341  | 98900231  | 360650  | 2.2E-09     | archaelysin family metallopeptidase 2                                                     |
| Mmp17                                   | 12  | 28171455  | 28172150  | 288626  | 1.2E-10     | matrix metallopeptidase 17                                                                |
| RGD1560350                              | 20  | 17488019  | 17488699  | 365554  | 1.2E-09     | similar to proteasome subunit iota                                                        |
| Pi16                                    | 20  | 7639255   | 7640255   | 294312  | 2.5E-14     | peptidase inhibitor 16                                                                    |
| <b>Receptors &amp; Binding Proteins</b> |     |           |           |         |             |                                                                                           |
| Abcc6                                   | 1   | 96527328  | 96528133  | 81642   | 4.5E-09     | ATP-binding cassette, sub-family C (CFTR/MRP), member 6                                   |
| Esrra                                   | 1   | 209597756 | 209598356 | 293701  | 1.2E-10     | estrogen related receptor, alpha                                                          |
| Pepd                                    | 1   | 87420067  | 87420667  | 292808  | 2.8E-09     | peptidase D                                                                               |
| Ranbp3l                                 | 2   | 58725173  | 58726193  | 294789  | 4.8E-11     | RAN binding protein 3-like                                                                |
| Olr414                                  | 3   | 163798054 | 163799129 | 56821   | 9.3E-16     | olfactory receptor 414                                                                    |
| Spsb2                                   | 4   | 160931316 | 160932317 | 297592  | 1.0E-12     | splA/ryanodine receptor domain and SOCS box containing 2                                  |
| Olr1070                                 | 7   | 8317229   | 8317931   | 366816  | 3.1E-21     | olfactory receptor 1070                                                                   |
| Abcc4                                   | 15  | 103052860 | 103053460 | 170924  | 4.0E-14     | ATP-binding cassette, sub-family C (CFTR/MRP), member 4                                   |
| Adra1a                                  | 15  | 46173075  | 46173997  | 29412   | 9.8E-09     | adrenergic, alpha-1A-, receptor                                                           |
| Olr1684                                 | 20  | 3497439   | 3498621   | 294151  | 1.1E-10     | olfactory receptor 1684                                                                   |
| <b>Signaling</b>                        |     |           |           |         |             |                                                                                           |
| Calca                                   | 1   | 172690139 | 172691119 | 24241   | 7.3E-13     | calcitonin-related polypeptide alpha                                                      |
| Cnksr3                                  | 1   | 37957713  | 37958623  | 308113  | 4.4E-10     | Cnksr family member 3                                                                     |

| Gene Symbol | Chr | Start     | Stop      | Gene ID | min p-value | Gene Title                                                                       |
|-------------|-----|-----------|-----------|---------|-------------|----------------------------------------------------------------------------------|
| Gng8        | 1   | 77218978  | 77219578  | 245986  | 1.9E-11     | guanine nucleotide binding protein (G protein), gamma 8                          |
| RAB13       | 2   | 182460590 | 182461570 | 81756   | 2.3E-43     | RAB13, member RAS oncogene family                                                |
| ANP32E      | 2   | 190715161 | 190716273 | 361999  | 1.4E-15     | acidic (leucine-rich) nuclear phosphoprotein 32 family, member E                 |
| Egflam      | 2   | 56666338  | 56667335  | 365691  | 6.9E-18     | EGF-like, fibronectin type III and laminin G domains                             |
| Eps8l3      | 2   | 203455748 | 203456642 | 295361  | 1.3E-10     | EPS8-like 3 (Epidermal growth factor receptor kinase substrate 8-like protein 3) |
| Notch2      | 2   | 192855641 | 192856541 | 29492   | 1.3E-16     | Notch homolog 2 (Drosophila)                                                     |
| Dusp15      | 3   | 143297017 | 143298106 | 362238  | 5.8E-21     | dual specificity phosphatase 15                                                  |
| Acap3       | 5   | 172749107 | 172749987 | 313772  | 5.4E-10     | ArfGAP with coiled-coil, ankyrin repeat and PH domains 3                         |
| LOC683719   | 5   | 86273089  | 86273964  | 683719  | 5.6E-11     | similar to RAS and EF hand domain containing                                     |
| Itga7       | 7   | 2230364   | 2231254   | 81008   | 4.0E-08     | integrin, alpha 7                                                                |
| Palm        | 7   | 11424819  | 11425640  | 170673  | 6.1E-18     | paralemmin                                                                       |
| Shc2        | 7   | 11584014  | 11584614  | 314612  | 1.2E-16     | SHC (Src homology 2 domain containing) transforming protein 2                    |
| Mapk11      | 7   | 127442049 | 127442649 | 689314  | 4.7E-13     | mitogen-activated protein kinase 11                                              |
| Shank3      | 7   | 127816023 | 127816717 | 59312   | 5.0E-15     | SH3 and multiple ankyrin repeat domains 3                                        |
| Calcoco1    | 7   | 141470621 | 141471436 | 246047  | 3.8E-15     | calcium binding and coiled coil domain 1                                         |
| Grasp       | 7   | 139968279 | 139968967 | 192254  | 1.8E-07     | GRP1 (general receptor for phosphoinositides 1)-associated scaffold protein      |
| Anp32a      | 8   | 66488157  | 66489557  | 25379   | 3.8E-09     | acidic (leucine-rich) nuclear phosphoprotein 32 family, member A                 |
| Snx33       | 8   | 60673757  | 60674357  | 315696  | 3.1E-24     | sorting nexin 33                                                                 |
| Hsp90ab1    | 9   | 11032495  | 11033610  | 301252  | 5.1E-10     | heat shock protein 90kDa alpha (cytosolic), class B member 1                     |
| PLEKHH3     | 10  | 90191341  | 90192426  | 360634  | 1.3E-16     | pleckstrin homology domain containing, family H (with MyTH4 domain) member 3     |
| Akap17a     | 12  | 16824203  | 16825214  | 288526  | 1.1E-10     | A kinase (PRKA) anchor protein 17A                                               |
| Sorbs3      | 15  | 50590321  | 50591217  | 282843  | 7.4E-09     | sorbin and SH3 domain containing 3                                               |
| Grk6        | 17  | 15237197  | 15237797  | 59076   | 3.7E-13     | G protein-coupled receptor kinase 6                                              |
| Morg1       | 19  | 24731570  | 24733149  | 288924  | 4.1E-08     | mitogen-activated protein kinase organizer 1                                     |
| Ppp1r10     | 20  | 2984169   | 2984883   | 65045   | 1.2E-29     | protein phosphatase 1, regulatory subunit 10                                     |
| Ppp1r10     | 20  | 2987593   | 2988193   | 65045   | 7.7E-09     | protein phosphatase 1, regulatory subunit 10                                     |
| Ptprs       | Un  | 25300105  | 25300805  | 25529   | 9.8E-12     | protein tyrosine phosphatase, receptor type, S                                   |

| Gene Symbol                                   | Chr | Start     | Stop      | Gene ID | min p-value | Gene Title                                                       |
|-----------------------------------------------|-----|-----------|-----------|---------|-------------|------------------------------------------------------------------|
| Gprasp1                                       | X   | 1331319   | 1331919   | 171407  | 2.7E-09     | G protein-coupled receptor associated sorting protein 1          |
| <b>Transcription</b>                          |     |           |           |         |             |                                                                  |
| PITX3                                         | 1   | 251356410 | 251357495 | 29609   | 3.5E-36     | paired-like homeodomain 3                                        |
| Ccdc21                                        | 5   | 152927566 | 152928385 | 362622  | 5.7E-18     | coiled-coil domain containing 21                                 |
| Fbxo2                                         | 5   | 165238253 | 165238963 | 85273   | 2.0E-08     | F-box protein 2                                                  |
| Ccdc17                                        | 5   | 136879913 | 136881400 | 500528  | 3.1E-14     | coiled-coil domain containing 17                                 |
| NR4A3                                         | 5   | 64719197  | 64719987  | 58853   | 1.2E-13     | nuclear receptor subfamily 4, group A, member 3                  |
| Tardbp                                        | 5   | 165710469 | 165711069 | 298648  | 2.6E-09     | TAR DNA binding protein                                          |
| Tceb1                                         | 5   | 1975203   | 1976200   | 64525   | 1.2E-10     | transcription elongation factor B (SII), polypeptide 1           |
| RGD1563216                                    | 6   | 108814406 | 108815606 | 500694  | 1.4E-36     | similar to HESB like domain containing 1                         |
| Batf                                          | 6   | 109793195 | 109793870 | 299206  | 1.6E-08     | basic leucine zipper transcription factor, ATF-like              |
| Scx                                           | 7   | 114502670 | 114504375 | 680712  | 6.7E-13     | scleraxis                                                        |
| Maff                                          | 7   | 117329082 | 117330072 | 366960  | 6.1E-11     | v-maf musculoaponeurotic fibrosarcoma oncogene homolog F (avian) |
| Bcl9l                                         | 8   | 47449801  | 47450705  | 300673  | 1.4E-14     | B-cell CLL/lymphoma 9-like                                       |
| Klhdc3                                        | 9   | 10052217  | 10053619  | 363192  | 1.4E-07     | kelch domain containing 3                                        |
| Foxp4                                         | 9   | 8507797   | 8509094   | 363185  | 7.5E-12     | forkhead box P4                                                  |
| Ubtf                                          | 10  | 91376259  | 91377139  | 25574   | 1.8E-09     | upstream binding transcription factor, RNA polymerase I          |
| Scand3                                        | 12  | 27861394  | 27861994  | 288622  | 4.7E-09     | SCAN domain containing 3                                         |
| Higd2al1                                      | 12  | 1366187   | 1366787   | 688606  | 7.1E-07     | HIG1 hypoxia inducible domain family, member 2A-like 1           |
| Atf3                                          | 13  | 107225329 | 107225929 | 25389   | 1.9E-07     | activating transcription factor 3                                |
| Ndrg2                                         | 15  | 27346660  | 27347666  | 171114  | 1.1E-25     | N-myc downstream regulated gene 2                                |
| Zic5                                          | 15  | 107598237 | 107599148 | 361095  | 2.6E-17     | Zic family member 5 (odd-paired homolog, Drosophila)             |
| Ing1                                          | 16  | 82793987  | 82794978  | 306626  | 1.1E-07     | inhibitor of growth family, member 1                             |
| Gata6                                         | 18  | 2502698   | 2503598   | 29300   | 6.2E-09     | GATA binding protein 6                                           |
| Klhl14                                        | 18  | 13281385  | 13282422  | 364823  | 1.2E-09     | kelch-like 14 (Drosophila)                                       |
| Fbxl8                                         | 19  | 35084702  | 35085522  | 498941  | 1.1E-12     | F-box and leucine-rich repeat protein 8                          |
| Armcx2                                        | X   | 122265349 | 122266237 | 367903  | 7.8E-33     | armadillo repeat containing, X-linked 2                          |
| <b>Translation &amp; Protein Modification</b> |     |           |           |         |             |                                                                  |
| Cstf3                                         | 3   | 89919001  | 89919799  | 362178  | 1.3E-13     | cleavage stimulation factor, 3' pre-RNA, subunit 3               |
| Eef2                                          | 7   | 10021587  | 10022487  | 29565   | 1.0E-14     | eukaryotic translation elongation factor 2                       |
| Rnasek                                        | 10  | 57077243  | 57078332  | 287453  | 1.3E-08     | ribonuclease, RNase K                                            |
| Igf2bp1                                       | 10  | 84714200  | 84715211  | 303477  | 8.0E-10     | insulin-like growth factor 2 mRNA binding protein 1              |
| Npm1                                          | 10  | 18062193  | 18062873  | 25498   | 7.1E-10     | nucleophosmin (nucleolar phosphoprotein B23, numatrin)           |

| Gene Symbol                        | Chr | Start     | Stop      | Gene ID | min p-value | Gene Title                                          |
|------------------------------------|-----|-----------|-----------|---------|-------------|-----------------------------------------------------|
| Eif4g1                             | 11  | 82470413  | 82471209  | 287986  | 4.8E-10     | eukaryotic translation initiation factor 4 gamma, 1 |
| Hnrpdl                             | 14  | 10859038  | 10859932  | 305178  | 6.9E-41     | heterogeneous nuclear ribonucleoprotein D-like      |
| Mrps18b                            | 20  | 2984169   | 2984883   | 294230  | 1.2E-29     | mitochondrial ribosomal protein S18B                |
| Mrps18b                            | 20  | 2987593   | 2988193   | 294230  | 7.7E-09     | mitochondrial ribosomal protein S18B                |
| Rpl36                              | Un  | 25163917  | 25164597  | 58927   | 1.9E-14     | ribosomal protein L36                               |
| <b>Miscellaneous &amp; Unknown</b> |     |           |           |         |             |                                                     |
| Giyd2                              | 1   | 185849246 | 185850026 | 293489  | 1.4E-12     | GIY-YIG domain containing 2                         |
| Tsku                               | 1   | 155621758 | 155622558 | 308843  | 2.8E-21     | tsukushin                                           |
| NSCAN chr1.2257.a                  | 1   | 220861164 | 220861964 |         | 3.8E-08     |                                                     |
| NSCAN pred chr1.948.a              | 1   | 101299220 | 101299820 |         | 4.1E-18     |                                                     |
| RGD1308958                         | 5   | 70448054  | 70449168  | 298020  | 7.5E-10     | similar to chromosome 9 open reading frame 5        |
| Birc6                              | 6   | 20847680  | 20848580  | 313876  | 2.0E-09     | baculoviral IAP repeat-containing 6                 |
| NSCAN pred chr6.009.a              | 6   | 1695151   | 1695930   |         | 8.6E-18     |                                                     |
| NSCAN pred chr6.1025.a             | 6   | 143691197 | 143692192 |         | 4.8E-16     |                                                     |
| RGD1308134                         | 10  | 57077243  | 57078332  | 287452  | 1.3E-08     | similar to RIKEN cDNA 1110020A23                    |
| Tmem119                            | 12  | 43859955  | 43860555  | 304581  | 2.8E-11     | transmembrane protein 119                           |
| NSCAN pred chr12.007.a             | 12  | 1019708   | 1020388   |         | 1.6E-08     |                                                     |
| RGD1307161                         | 13  | 99339499  | 99340519  | 305031  | 1.4E-19     | similar to 0610010K06Rik protein                    |
| Tmem33                             | 14  | 43516113  | 43517008  | 59303   | 2.9E-12     | transmembrane protein 33                            |
| NSCAN pred chr14.127.a             | 14  | 14702118  | 14702812  |         | 1.2E-08     |                                                     |
| NSCAN pred chr18.057.a             | 18  | 6993296   | 6994296   |         | 5.4E-08     |                                                     |
| NSCAN chr20.066.a                  | 20  | 3442365   | 3443350   |         | 1.3E-33     |                                                     |
| NSCAN pred chrX.212.a              | X   | 28736330  | 28736930  |         | 1.1E-08     |                                                     |
| EST's                              |     |           |           |         |             |                                                     |
| TL0AEA6YH06 mRNA seq               | 18  | 45009969  | 45010947  |         | 1.4E-06     |                                                     |
| TL0AEA9YC13 mRNA seq               | 18  | 72291368  | 72291968  |         | 5.0E-07     |                                                     |
| RGD1564058                         | 19  | 24731570  | 24733149  | 288925  | 4.1E-08     | similar to cDNA sequence BC056474                   |
