# Supplementary material for: Plastics Derived Endocrine Disruptors (BPA, DEHP and DBP) Induce Epigenetic Transgenerational Inheritance of Obesity, Reproductive Disease and Sperm Epimutations
Source: PubMed Central journal article supplement (PMC3554682; doi:10.1371/journal.pone.0055387), 2013-01-24
Supplement: pone.0055387.s007.pdf [file pone.0055387.s007.pdf]

**Supplemental Table S5.****Top KEGG Pathways Enriched with Plastics Sperm DMR Group Gene Lists**

| <b>Pathway Name</b>                 | <b># Genes affected</b> | <b># Genes in Pathway</b> |
|-------------------------------------|-------------------------|---------------------------|
| Endocytosis                         | 5                       | 231                       |
| Cell adhesion molecules (CAMs)      | 5                       | 151                       |
| Pathways in cancer                  | 5                       | 321                       |
| MAPK signaling pathway              | 4                       | 253                       |
| Ubiquitin mediated proteolysis      | 4                       | 127                       |
| Phagosome                           | 4                       | 191                       |
| HTLV-I infection                    | 4                       | 296                       |
| Cysteine and methionine metabolism  | 3                       | 36                        |
| Chemokine signaling pathway         | 3                       | 178                       |
| Focal adhesion                      | 3                       | 187                       |
| ECM-receptor interaction            | 3                       | 74                        |
| Tight junction                      | 3                       | 128                       |
| Antigen processing and presentation | 3                       | 100                       |
| Neurotrophin signaling pathway      | 3                       | 129                       |
| Olfactory transduction              | 3                       | 732                       |
| Regulation of actin cytoskeleton    | 3                       | 204                       |
| Herpes simplex infection            | 3                       | 207                       |
| Systemic lupus erythematosus        | 3                       | 114                       |
| Hypertrophic cardiomyopathy (HCM)   | 3                       | 85                        |
| Dilated cardiomyopathy              | 3                       | 94                        |
| Viral myocarditis                   | 3                       | 109                       |
